# Supplementary material for: Glucocorticoid‐mediated modulation of morphological changes associated with aging in microglia
Source: PubMed Central journal article supplement (PMC6052476; doi:10.1111/acel.12790), 2018-06-07

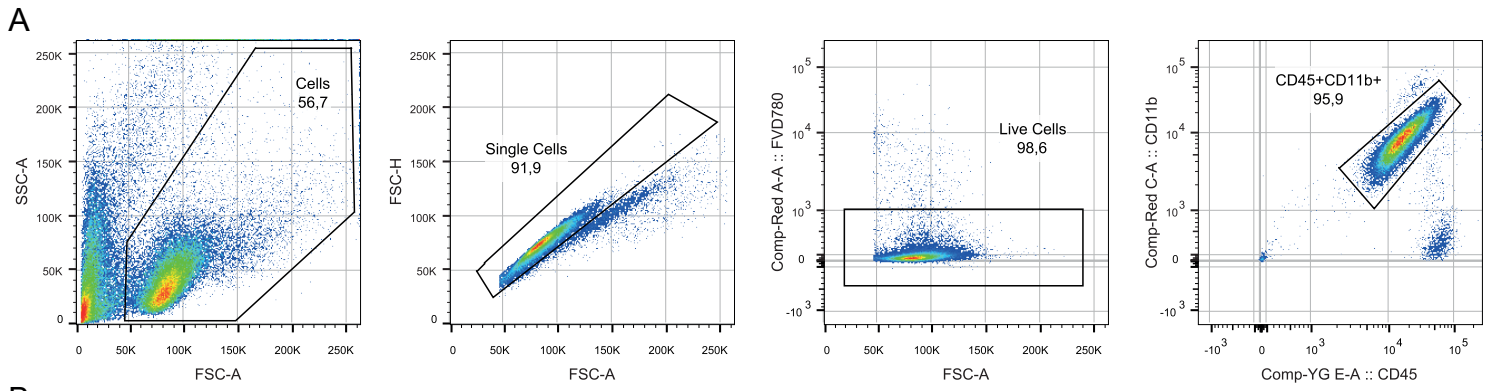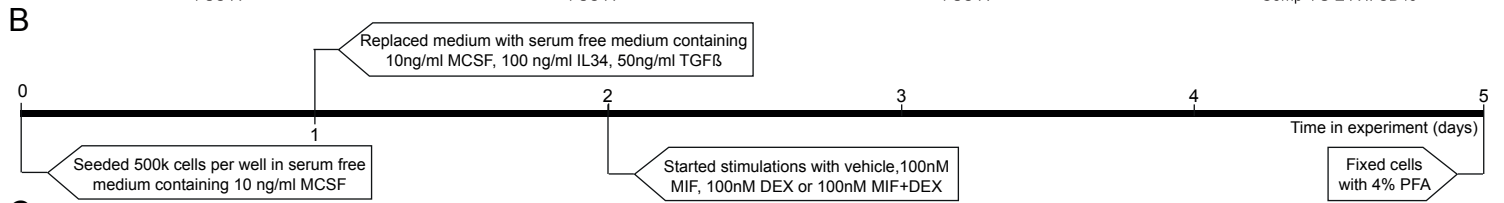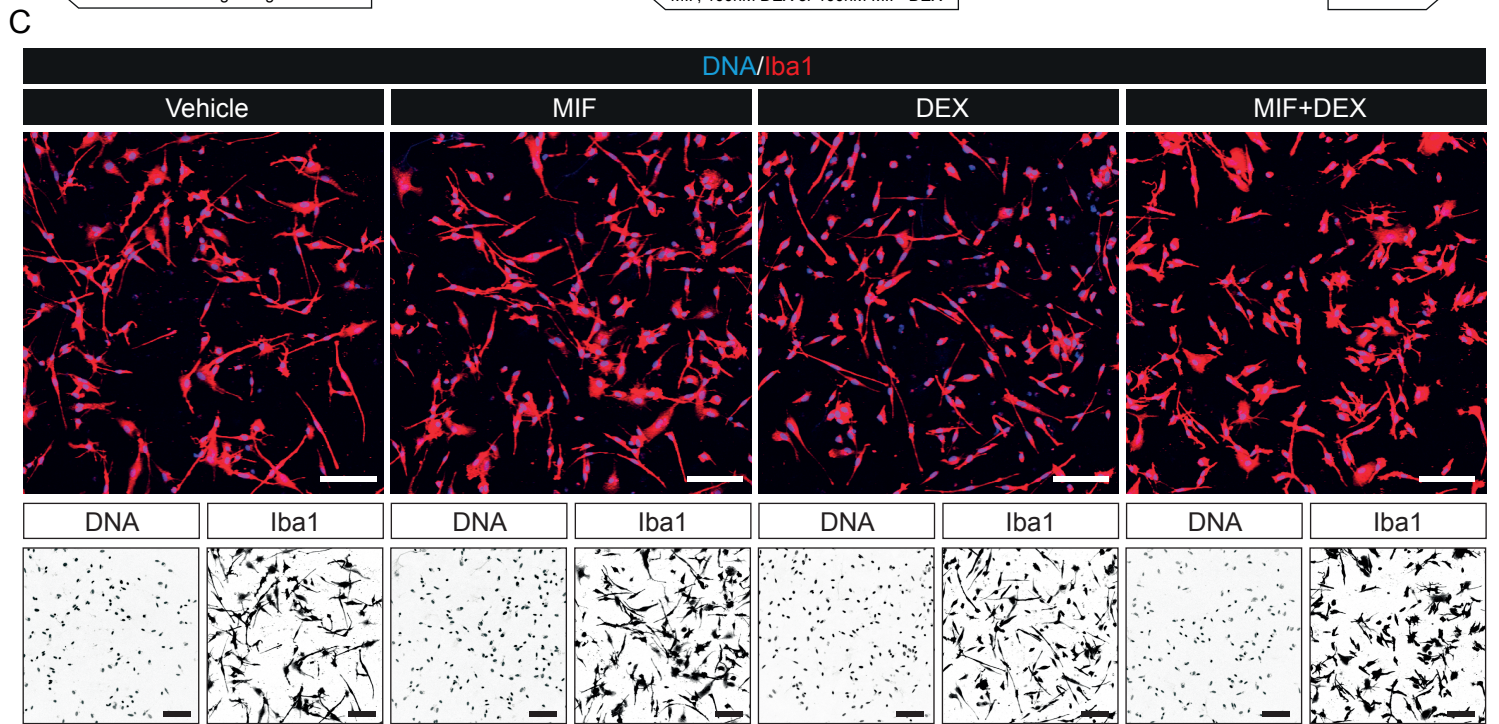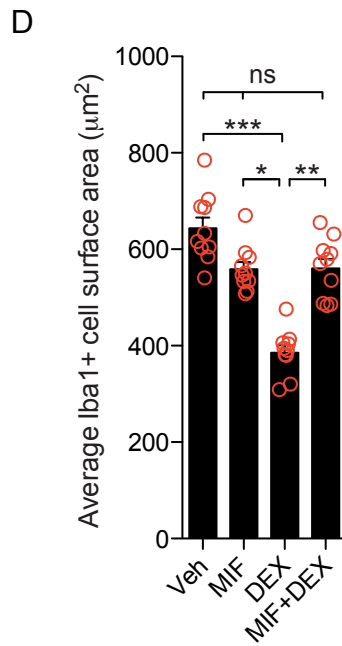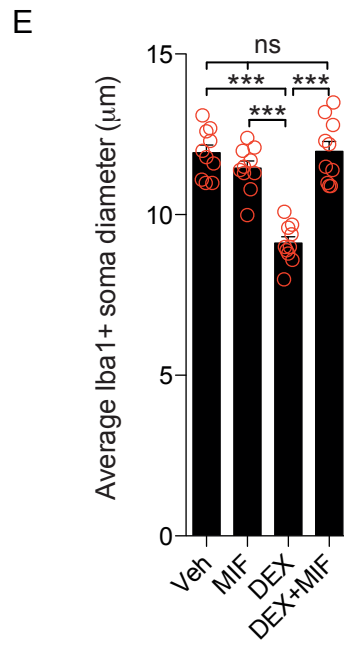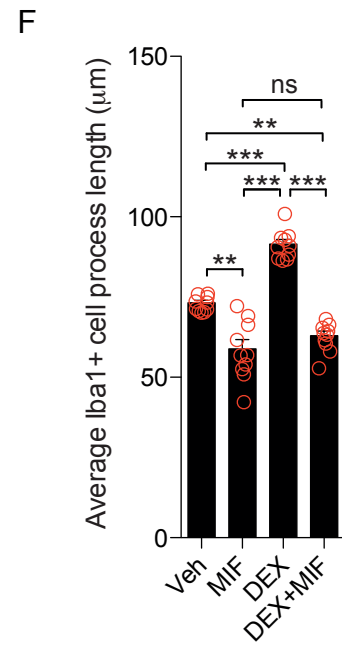

Supplement: ACEL-17-na-s004.pdf [file ACEL-17-na-s004.pdf]
